# Supplementary material for: X-Ray structural and gas phase studies of silver(i) perfluorinated carboxylate complexes with 2,2′-bipyridyl as potential precursors for chemical vapour deposition (CVD)
Source: Royal Society of Chemistry journal article supplement (doi:10.1039/b911741e), 2010-01-01
Supplement: b911741e.pdf [file b911741e.pdf]

**X-RAY STRUCTURAL AND GAS PHASE STUDIES  
OF SILVER(I) PERFLUORINATED CARBOXYLATES COMPLEXES  
WITH 2,2'-BIPYRIDYL AS POTENTIAL PRECURSORS FOR CHEMICAL VAPOR  
DEPOSITION (CVD)**

Edward Szłyk, Robert Szczęsny, Andrzej Wojtczak

*Nicolaus Copernicus University, Faculty of Chemistry, 87 100 Toruń, Poland*

**SUPPLEMENTARTARY INFORMATION**

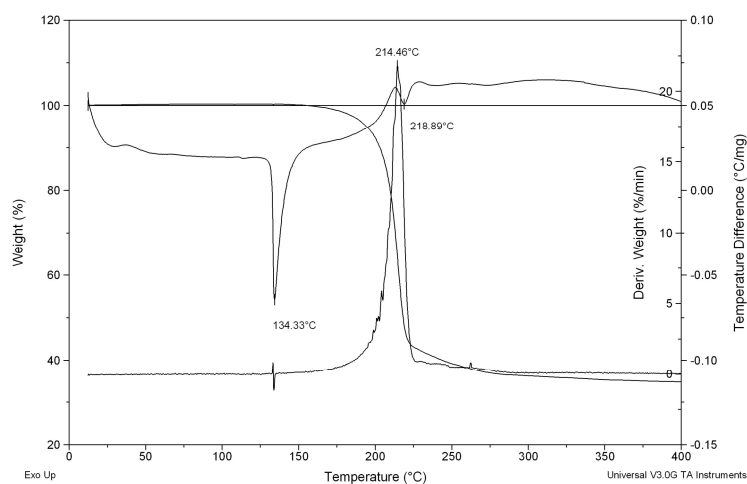

Fig. 1. TG, DTG and DTA plots for [Ag(CF<sub>3</sub>COO)(bpy)] (**1**) (5°/min., N<sub>2</sub>).

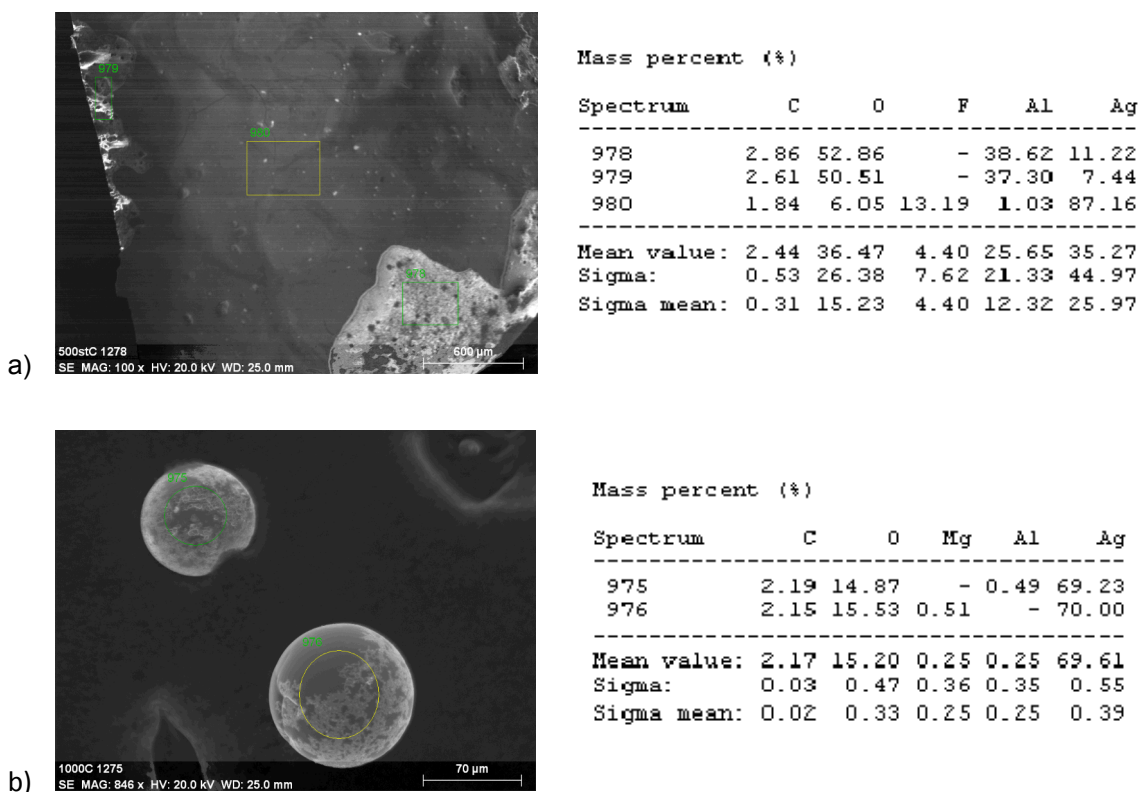

Fig. 2. SEM micrographs and EDX spectra of the decomposition product of  $[Ag(CF_3COO)(bpy)]$  (**1**) on crucible surfaces. ( $5^\circ/\text{min.}$ ,  $N_2$ ): a) under heating to  $500^\circ\text{C}$ , b) under heating to  $1000^\circ\text{C}$ .

Tab. 1.  $^{13}\text{C}$ ,  $^1\text{H}$  NMR spectra analysis for (**1**), (**2**) and (**3**) [ppm] ( $\text{CD}_3\text{Cl}_3$ ).

|                 | (1)                                                                                                                     | (2)                                                                                                                     | (3)                                                                                                                 |
|-----------------|-------------------------------------------------------------------------------------------------------------------------|-------------------------------------------------------------------------------------------------------------------------|---------------------------------------------------------------------------------------------------------------------|
| $^1\text{H}$    | 8.77 (A)<br>7.51 (B)<br>7.99 (C)<br>8.18 (D)                                                                            | 8.76 (A)<br>7.49 (B)<br>7.97 (C)<br>8.11 (D)                                                                            | 8.71 (A)<br>7.46 (B)<br>7.98 (C)<br>8.14 (D)                                                                        |
| $^{13}\text{C}$ | 122.0 (5)<br>125.5 (4)<br>138.9 (3)<br>151.2 (2)<br>151.6 (1)<br>162.6 ( $\delta$ COO,q)<br>$\Delta_{\text{COO}} = 0.5$ | 121.9 (5)<br>125.7 (4)<br>138.9 (3)<br>151.3 (2)<br>151.5 (1)<br>162.6 ( $\delta$ COO,t)<br>$\Delta_{\text{COO}} = 3.4$ | 122.1 (5)<br>125.6 (4)<br>138.9 (3)<br>151.5 (2)<br>- (1)<br>163.0 ( $\delta$ COO,t)<br>$\Delta_{\text{COO}} = 3.9$ |

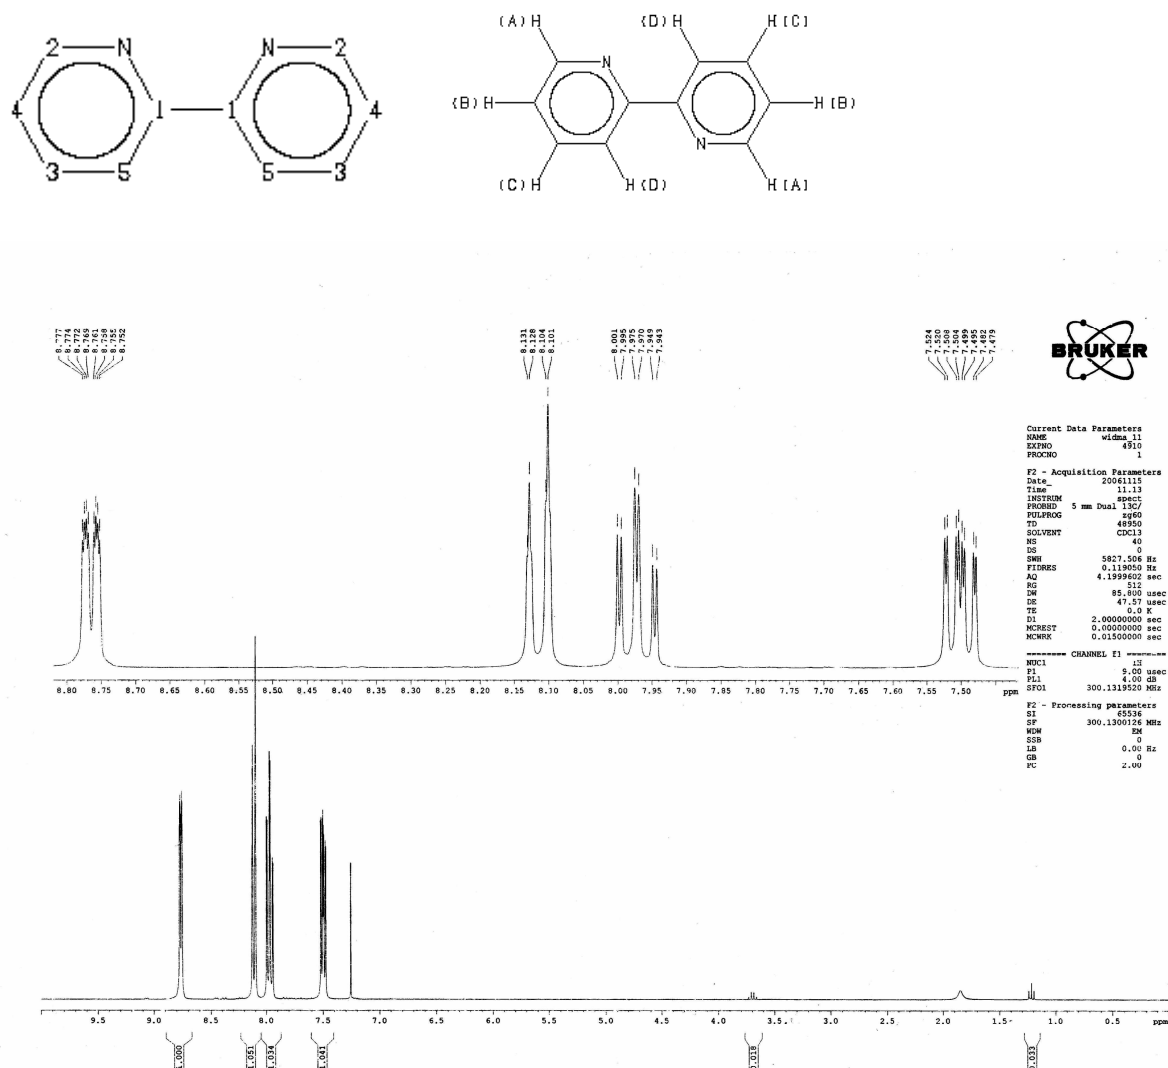

Fig. 3. <sup>1</sup>H NMR spectra of [Ag<sub>2</sub>(C<sub>2</sub>F<sub>5</sub>COO)<sub>2</sub>(bpy)] (**2**).

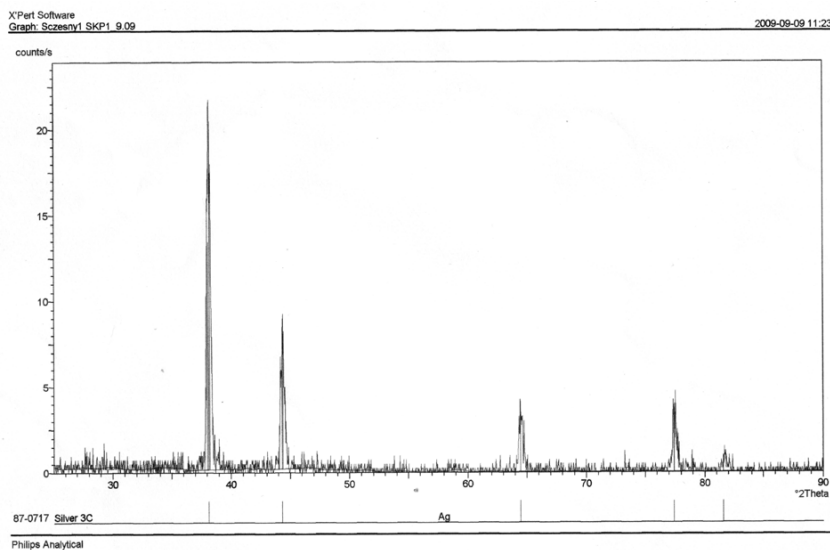

Fig. 4. XRD pattern of film obtained from [Ag<sub>2</sub>(C<sub>2</sub>F<sub>5</sub>COO)<sub>2</sub>(bpy)] (**2**) (thinner film).

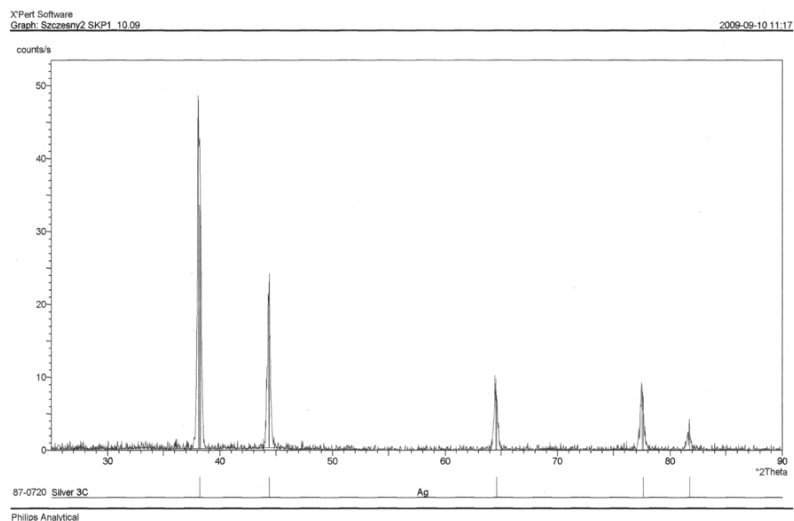

Fig. 5. XRD pattern of film obtained from  $[\text{Ag}_2(\text{C}_2\text{F}_5\text{COO})_2(\text{bpy})]$  (**2**) (largest thickness).
